# Supplementary material for: The E3 ligase Thin controls homeostatic plasticity through neurotransmitter release repression
Source: eLife. 2022 Jul 7;11:e71437. doi: 10.7554/eLife.71437 (PMC9299833; doi:10.7554/eLife.71437)
Supplement: Figure 2—figure supplement 1—source data 1. — Sustained homeostasis is impaired in thin mutants. [file elife-71437-fig2-figsupp1-data1.xlsx]

## Sheet: F2 S1
	mEPSC (nA)					EPSC (nA)
	WT	GluRIIAsp16/GluRIIAsp16	thinΔA/thinΔA	GluRIIAsp16,thinΔA/GluRIIAsp16,thinΔA		WT	GluRIIAsp16/GluRIIAsp16	thinΔA/thinΔA	GluRIIAsp16,thinΔA/GluRIIAsp16,thinΔA
	0.93	0.54	0.75	0.47		165.2	170.54	155.32	118.04
	1.12	0.76	0.85	0.46		195.01	162.43	240.33	100.02
	0.93	0.45	0.8	0.65		163.55	115.96	214.56	143.91
	0.94	0.28	0.82	0.54		165.34	106.43	210.11	92.02
	1.26	0.5	0.8	0.47		195.02	109.23	175.97	95
	0.81	0.68	0.74	0.51		163.81	175.32	174.73	92.33
	1.01	0.54	0.7	0.55		170.45	165.99	214.44	110.87
	1.01	0.46	0.92	0.58		125.23	128.18	180.51	105.92
	0.83	0.52	0.7	0.53		129.22	130.91	185.22	89.65
	1.12	0.55	0.52	0.54		190.01	135.54	110.8	123.93
	1.01	0.47	0.72	0.64		190.91	155.77	135.11	50.92
		0.6	0.52	0.57			120.46	144.06	130.23
		0.53	0.84	0.65			125.91	118.43	108.21
			0.91	0.77				222.39	130.81
			1.05					150.5
			0.92					165.73
mean	0.997273	0.529231	0.785	0.566429		168.523	138.667	174.888	106.561
SD	0.132294	0.115214	0.139905	0.0864342		24.202	24.2532	38.2504	23.1561
SEM	0.0418352	0.0332595	0.0361232	0.0239725		7.65334	7.00129	9.87622	6.42233
