# Supplementary material for: The E3 ligase Thin controls homeostatic plasticity through neurotransmitter release repression
Source: eLife. 2022 Jul 7;11:e71437. doi: 10.7554/eLife.71437 (PMC9299833; doi:10.7554/eLife.71437)
Supplement: Figure 2—source data 1. [file elife-71437-fig2-data1.xlsx]

## Sheet: F2
	mEPSC (nA)										EPSC (nA)
	WT		thinΔA/thinΔA		pre. Rescue		post. Rescue				WT		thinΔA/thinΔA		pre. Rescue		post. Rescue
	Control	PhTX	Control	PhTX	Control	PhTX	Control	PhTX			Control	PhTX	Control	PhTX	Control	PhTX	Control	PhTX
	1.17812	0.712896	0.792643	0.425872	0.645404	0.512562	0.985	0.677			149.05	105.54	115.22	60.1	106.2	60.91	160.21	40.01
	1.0191	0.640418	0.825793	0.447703	0.912331	0.56895	1.259	0.751			132.12	130.89	120.54	118.05	108.3	111.01	140.83	90.08
	0.948587	0.678039	0.741618	0.417717	0.740544	0.518066	1.065	0.738			112.55	100.21	155.92	118.99	110.4	93.99	150.99	110.85
	0.896176	0.653228	0.811473	0.394392	0.905338	0.471381	1.021	0.711			190.42	103.54	200.95	90.23	130.4	122.34	140.91	120.45
	0.992841	0.689908	0.807708	0.473643	0.886415	0.504357	1.32	0.723			119.9	120.65	155.11	175.54	170.1	170.81	180.12	145.92
	1.02268	0.695841	0.881388	0.436218	0.837057	0.38907	1.293	0.524			130.01	125.02	141	60.95	130.5	118.67	210.495	144.84
	0.987082	0.758518	0.766906	0.515734	0.903412	0.530258	0.686	0.6			110.33	108.69	145.82	150.29	165.9	61.54	185.54	210.123
	0.979577	0.580411	0.916466	0.413867	0.811903	0.434389	0.983	0.797			105.67	95.12	166.39	80.02	115.6	116.44	150.98	175.55
	1.58985	0.564582	0.621681	0.333763	0.845971	0.372122	0.715	0.654			140.98	112.54	142.56	112.083	140.1	94.12	230.87	150.88
	1.3343	0.563509	0.848064	0.354222	0.976554	0.464688	1.321	0.691			108.43	157.97	150.71	38.923	108.6	95.24	230.77	140.12
	1.18548	0.539764	0.662649	0.647984	0.927881		0.751	0.633			95.23	157.321	135.022	57.8134	125.8	85.66	215.86	170.94
	1.04911	0.634204	0.620432	0.427985			0.738	0.777			95.4	170.91	142.93	126.02	67.2	100.54	210.23	115.84
	1.19882	0.57852	1.09197	0.401391			0.711	0.585			210.12	137.023	135.44	106.94	73.6	90.92	162.012	149.466
	1.0252		0.942614	0.320325			1.228	0.466			245.54	215.96	155.12	92.5234	90.19	32.03	182.33	91.09
			0.891356	0.288892			1.04	0.403			150.01	150.47	172.83	137.043	130.11	45	166.19	100
			0.806337	0.347884			1.094	0.552			197.31	145.94	159.04	123.44	115.23	70.13	165.37	86.24
			0.868971	0.898297			0.977	0.548			191.5	127.253	188.84	85.01	135.64	115.98	165.43	85.84
			0.931712	0.668672			1.013	0.491			180.9	155.462	160.81	100.85	85.66	70.9	160.1	80.99
				0.599805			1.01	0.497			185.65	159.861	180.91	105.91	85.42	76.34	135.32	88.33
				0.766322			0.833	0.436			185.19	179.946	200.07	70.34	127.01	87.55	125.44	115.28
				0.672863			0.707	0.623			180.04	198.999	129.49	80.53	82.06	105.88	135.88	100.112
							0.797	0.619			206.83	159.977	165.81	128.511	85.29	90.12	181.75	89.022
							0.959	0.439			164.223	183.312	125.4	85.985	137.92	70.94	114.43	88.54
							0.654	0.72			174.718	195.052		53.93	160.88	86.93	170.55	100.85
							0.691				170.929	190.964		110.85	160.53	60.98	180.91	107.56
											140.226	147.864		66.01	129.32	94.21	183.22	109.66
											155.738	129.442		82.05	170.64	85.54	200.39	45.909
											151.876	122.028		98.294	200.84	85.66
											106.695	133.367			117.73	115.01
											141.499	138.74			105.44	116.83
											148.925	127.352			80.9	99.11
											169.914	129.898			67.12	100.21
											162.414	179.074			105.54	108.94
												173.867			146.92	78.8
												108.214			106.82	115.45
															128.42	83.442
															140.84	72.84
															91.23	105.91
															116.18	70.91
															125.83
															125.43
															145.92
															106.01
															150.5
															126.15
															180.9
															200.65
															160.4
															142.44
															123.2
															100.1
mean	1.10049	0.63768	0.823877	0.488264	0.853892	0.476584	0.95404	0.610625			154.859	145.099	154.171	97.0438	124.394	91.4829	171.745	113.129
SD	0.184377	0.06799	0.117982	0.161127	0.0940831	0.0629982	0.217923	0.116714			36.8249	31.336	23.584	31.5621	31.8111	24.8447	30.8247	38.2255
SEM	0.0511369	0.019627	0.0286148	0.036029	0.0297517	0.0209994	0.0444834	0.0243366			6.50978	5.37408	5.02813	6.07413	4.49876	4.03034	6.04522	7.49663
Each data point corresponds to the average of one NMJ unless otherwise noted. mEPSCs and EPSCs were recorded in different NMJs because different headstage combinations were used to improve the signal-to-noise-ratio of mEPSC recordings. Hence, sample sizes differed between mEPSC and EPSC recordings, and quantal content was calculated by dividing the average EPSC amplitude of each NMJ by the averag…
