# Supplementary material for: The E3 ligase Thin controls homeostatic plasticity through neurotransmitter release repression
Source: eLife. 2022 Jul 7;11:e71437. doi: 10.7554/eLife.71437 (PMC9299833; doi:10.7554/eLife.71437)
Supplement: Figure 3—figure supplement 1—source data 1. — Postsynaptic thin expression does not affect presynaptic homeostatic plasticity (PHP) or baseline synaptic transmission. [file elife-71437-fig3-figsupp1-data1.xlsx]

## Sheet: F3 S1
	Brp puncta #		HRP area (um2)		Brp puncta density (um-2)		Brp puncta intensity (a.u.)
	muscle-Gal4	muscle-Gal4 > UAS-thin	muscle-Gal4	muscle-Gal4 > UAS-thin	muscle-Gal4	muscle-Gal4 > UAS-thin	muscle-Gal4	muscle-Gal4 > UAS-thin
	646	911	521.98	716.98	1.24	1.27	206.7	60.62
	636	1226	448.62	811.25	1.42	1.51	187.05	86.84
	517	831	453.71	749.88	1.14	1.11	179.38	90.23
	491	802	344.72	531.48	1.42	1.51	217.99	114.28
	426	640	360.13	547.19	1.18	1.17	203.94	102.3
	395	751	346.26	597.12	1.14	1.26	154.08	136.76
	296	975	220.59	805.48	1.34	1.21	187.22	133.45
	518	1033	571.72	779.69	0.91	1.32	206.36	115.39
	645	769	595.06	649.75	1.08	1.18	149.67	97.13
	458	745	407.53	572.57	1.12	1.3	164.15	87.19
		539		409.03		1.32		74.36
		514		363.94		1.41		104.03
mean	502.8	811.333	427.032	627.863	1.199	1.2975	185.654	100.215
SD	116.11	204.504	115.535	150.418	0.160031	0.127574	23.6869	22.525
SEM	38.7033	61.6601	38.5116	45.3528	0.0533437	0.0384649	7.89563	6.79153
	mEPSC (nA)				EPSC (nA)
	muscle-Gal4	muscle-Gal4 +PhTX	muscle-Gal4 > UAS-thin	muscle-Gal4 > UAS-thin +PhTX	muscle-Gal4	muscle-Gal4 +PhTX	muscle-Gal4 > UAS-thin	muscle-Gal4 > UAS-thin +PhTX
	1.394	0.519	0.961	0.647	147.2	120.81	175.81	90.11
	0.926	0.455	1.19	0.516	113.41	115.23	100.88	65.03
	1.207	0.491	1.012	0.529	160.65	135.43	145.234	110.88
	0.808	0.752	1.197	0.75	122.12	160.55	160.852	120.98
	0.814	0.747	0.956	0.773	188.94	150.5	184.23	90.43
	0.873	0.654	0.803	0.994	185.24	100.11	106.91	118.56
	0.882	0.609	0.994	0.751	180.65	135.09	148.03	97.82
	1.148	0.741	0.891	0.599	135.94	170.18	185.122	136.21
	0.734	0.707	1.125	0.553	220.66	180.17	140.983	80.88
	0.974	0.88	1.058	0.564	186.46	215.4	150.83	150.03
	1.116	0.749	1.045	0.694	178.9	179.39	180.82	190.85
	0.988	0.542	1.015	0.507	230.22	170.2	150.023	110.12
	0.972	0.887	0.873	0.778	190.88	182.03	188.84	144.44
	1.062	0.876		0.737	210.78	200.33		170.2
	0.942	0.792		0.669	198.42	204.75		170.924
	1.121	0.681		0.71	127.11	162.93		185.34
		0.75		0.444		120.19		140.634
				0.644				100.92
				0.668				195.18
				0.745				260.109
				0.68				185.814
				0.681				162.234
				0.75				120.11
mean	0.997562	0.696	1.00923	0.668826	173.599	159.017	155.274	139.035
SD	0.170205	0.134692	0.117437	0.118993	35.6359	33.7202	28.3785	46.2277
SEM	0.0439468	0.0336729	0.033901	0.0253695	9.20114	8.43004	8.19217	9.85577
