# Supplementary material for: The E3 ligase Thin controls homeostatic plasticity through neurotransmitter release repression
Source: eLife. 2022 Jul 7;11:e71437. doi: 10.7554/eLife.71437 (PMC9299833; doi:10.7554/eLife.71437)
Supplement: Figure 3—source data 1. [file elife-71437-fig3-data1.xlsx]

## Sheet: F3
	Brp puncta #				HRP area (um2)				Brp puncta density (um-2)				Brp puncta intensity (a.u.)
	WT	thinΔA/thinΔA	pre. rescue	post. rescue	WT	thinΔA/thinΔA	pre. rescue	post. rescue	WT	thinΔA/thinΔA	pre. rescue	post. rescue	WT	thinΔA/thinΔA	pre. rescue	post. rescue
	516	776	449	676	378.3	534.98	274.5	728.04	1.36	1.45	1.64	0.93	31.96	51.94	71.42	42.42
	432	532	503	474	236.71	666.35	487.44	467.01	1.83	0.8	1.03	1.01	30.84	118.24	94.23	34.94
	557	376	441	727	650.65	323.91	252.06	952.84	0.86	1.16	1.75	0.76	194.03	71.13	108.28	38.23
	489	555	532	631	478.28	488.65	311.52	734.11	1.02	1.14	1.71	0.86	199.79	33.23	99.6	38.9
	400	280	344	577	361.95	305.9	225.28	673.34	1.11	0.92	1.53	0.86	177.33	70.56	34.02	33.45
	294	536	479	612	257.52	332.7	390.94	491.24	1.14	1.61	1.23	1.25	197.99	30.73	76.25	165.27
	420	179	451	553	516.7	150.66	414.72	448.16	0.81	1.19	1.09	1.23	208.39	65.82	61.27	159.11
	466	399	373	497	516.64	319.92	182.28	405.78	0.9	1.25	2.05	1.22	204.93	69.49	78.3	152.55
	354		274	493	380.25		266.18	386.76	0.93		1.03	1.27	219.91		61.31	173.5
	331		478	577	368.84		419.02	532	0.9		1.14	1.08	213.92		97.41	194.57
			483	501			340.72	427.19			1.42	1.17			38.01	184.01
			876	493			526.38	429.8			1.66	1.15			20.56	196.53
				370				298.74				1.24				191.83
mean	425.9	454.125	473.583	552.385	414.584	390.384	340.92	536.539	1.086	1.19	1.44	1.07923	167.909	63.8925	70.055	123.485
SD	83.8059	185.82	146.248	95.2571	126.62	162.145	107.538	183.002	0.118976	0.260768	0.334501	0.176137	13.1223	27.4339	28.1293	71.8943
SEM	27.9353	70.2333	44.0954	27.4984	42.2067	61.2852	32.424	52.8281	0.102875	0.0985611	0.100856	0.0508465	24.2906	10.369	8.48129	20.7541
