# Supplementary material for: The E3 ligase Thin controls homeostatic plasticity through neurotransmitter release repression
Source: eLife. 2022 Jul 7;11:e71437. doi: 10.7554/eLife.71437 (PMC9299833; doi:10.7554/eLife.71437)
Supplement: Figure 4—figure supplement 1—source data 1. — Presynaptic thinRNAi expression blocks presynaptic homeostatic plasticity (PHP) and induces a slight increase in AZ number. [file elife-71437-fig4-figsupp1-data1.xlsx]

## Sheet: F4 S1
	Brp puncta #		HRP area (um2)		Brp puncta density (um-2)		Brp puncta intensity (a.u.)
	elavC155-Gal4 > UAS-mCherryRNAi	elavC155-Gal4 > UAS-thinRNAi	elavC155-Gal4 > UAS-mCherryRNAi	elavC155-Gal4 > UAS-thinRNAi	elavC155-Gal4 > UAS-mCherryRNAi	elavC155-Gal4 > UAS-thinRNAi	elavC155-Gal4 > UAS-mCherryRNAi	elavC155-Gal4 > UAS-thinRNAi
	616	874	423.42	701.8	1.45	1.25	105.61	97.77
	565	568	317.28	227.56	1.78	2.5	136.46	55.34
	512	721	392.03	592.9	1.31	1.22	104.89	85.02
	489	744	289.15	770.93	1.69	0.97	66.2	103.18
	767	889	665.11	480.76	1.15	1.85	17.96	48.33
	624	809	324.77	530.2	1.92	1.53	32.17	45.79
	479	490	476.59	311.59	1.01	1.57	18.19	61.8
	620	747	527.67	366.17	1.17	2.04	22.2	53.11
	732	947	610.42	763.55	1.2	1.24	19.55	36.01
	692	1003	486.91	764.38	1.42	1.31	21.52	26.09
	723	747	374.55	470.64	1.93	1.59	28.89	40.27
	441	772	388.45	494.27	1.14	1.56	24.13	33.79
		826		438.86		1.88		39.29
		758		421.88		1.8		28.29
		645		334.01		1.93		47.47
		507		259.47		1.95		49.02
mean	605	752.938	439.696	495.561	1.43083	1.63687	49.8142	53.1606
SD	109.15	145.802	117.378	180.158	0.323966	0.389799	42.4533	23.2276
SEM	32.9098	37.646	35.3907	46.5166	0.0976793	0.100646	12.8002	5.99734
	elavC155-Gal4 > UAS-thinRNAi
	mEPSC (nA)		EPSC (nA)
	Control	PhTX	Control	PhTX
	1.247	0.41687	214.97	107.57
	1.04	0.40769	215.444	139.42
	1.176	0.45481	236.077	145.56
	1.576	0.46362	284.918	135.4
	1.181	0.36769	199.69	135.66
	0.77992	0.665	189.2	125.27
	0.7883	0.536	225.39	138.07
	0.60906	0.677	190.42	122.96
	0.62141	0.556	172.9	108.4
	0.46752	0.716	186.85	146.55
	0.80241	0.661	194.73	176.45
	0.896	0.729	252.31	172.93
	0.931	0.779	178.55	172.2
	0.75		159.16
mean	0.918973	0.571514	207.186	140.495
SD	0.298235	0.140138	33.8604	22.5871
SEM	0.0827156	0.0404543	9.39118	6.52033
