# Supplementary material for: The E3 ligase Thin controls homeostatic plasticity through neurotransmitter release repression
Source: eLife. 2022 Jul 7;11:e71437. doi: 10.7554/eLife.71437 (PMC9299833; doi:10.7554/eLife.71437)
Supplement: Figure 4—source data 1. [file elife-71437-fig4-data1.xlsx]

## Sheet: F4
	mEPSC (nA)		EPSC (nA)		RRP size (cum. EPSC/mEPSC)		Pr (EPSC 1/cum. EPSC)		PPR (EPSC2/EPSC1)
	elavC155-Gal4 > UAS-mCherryRNAi	elavC155-Gal4 > UAS-thinRNAi	elavC155-Gal4 > UAS-mCherryRNAi	elavC155-Gal4 > UAS-thinRNAi	elavC155-Gal4 > UAS-mCherryRNAi	elavC155-Gal4 > UAS-thinRNAi	elavC155-Gal4 > UAS-mCherryRNAi	elavC155-Gal4 > UAS-thinRNAi	elavC155-Gal4 > UAS-mCherryRNAi	elavC155-Gal4 > UAS-thinRNAi
	1.174	1.247	186.535	209.942	815.049	1496.1	0.173049	0.13	0.66475	0.64707
	1.025	1.073	168.123	202.381	1507.8	3214.4	0.120481	0.08	0.835703	0.70976
	0.958	1.04	213.72	248.9	2727.61	1932.8	0.0860764	0.16	0.766679	0.75995
	1.175	1.176	212.924	236.583	1499.88	2057.55	0.162022	0.12	0.765794	0.80466
	0.975	1.576	189.522	257.15	1619.49	1714.15	0.0922419	0.14	0.647079	0.68846
	0.84	1.181	211.987	254.048	903.498	2277.16	0.238537	0.13	0.85601	0.83451
	1.042	1.146	180.34	223.969	1537.03	2626.51	0.114171	0.1	0.756382	0.74356
	1.132	1.039	90.45	203.975	1826.21	3473.5	0.129621	0.08	0.676438	0.83577
	1.106	0.984	163.91	248.905	1284.93	2727.05	0.12707	0.13	0.736555	1.0976
	0.949	1.024	230.21	234.096	1164.76	2197.64	0.113564	0.13	0.39241	0.75831
	1.055	0.978	187.45	264.909	1461.12	2207.13	0.14018	0.14	0.57683	0.97218
	1.126	0.926	180.5	218.111	1307.55	1226.21	0.179247	0.19	0.631536	0.80753
	1.023	0.943	216.95	252.12	1652.34	1797.87	0.145572	0.12	0.654535	1.0726
	1.097	0.951	130.13	200.84	2451.78	1944.57	0.0758821	0.15	0.718182	0.79276
	1.075	0.994	190.54	200.41	1414.94	3092.02	0.164876	0.09	0.787944	0.67853
	1.004	1.036	165.65	220.4	1512.97	1783.08	0.117545	0.17	0.73956	0.82727
	1.039	1.075	120.93	190.012		1934.47		0.14		0.67493
			178.95	170.29		2201.38		0.14		0.7021
			122.12	220.3		1624.76		0.11		0.68489
			153.43	189.28
			177.984	190.82
			145.205	202.11
				220.21
				160.08
				240.04
				198.23
				270.22
				214.97
mean	1.04676	1.08171	173.525	219.404	1542.94	2185.7	0.136258	0.128947	0.700399	0.794339
SD	0.087093	0.156564	35.4441	28.3236	487.053	600.092	0.0408891	0.0288472	0.113784	0.123386
SEM	0.0217733	0.039141	7.73453	5.45088	125.757	141.443	0.0105575	0.00679936	0.0275966	0.026925
