# Supplementary material for: The E3 ligase Thin controls homeostatic plasticity through neurotransmitter release repression
Source: eLife. 2022 Jul 7;11:e71437. doi: 10.7554/eLife.71437 (PMC9299833; doi:10.7554/eLife.71437)
Supplement: Figure 5—figure supplement 1—source data 1. — Dysbindin and Synapsin distribute in the periphery of synaptic boutons, endogenous Thin localizes close to Brp, and presynaptic dysbindin overexpression does not affect neuromuscular junction (NMJ) morphology. [file elife-71437-fig5-figsupp1-data1.xlsx]

## Sheet: F5 S1
5F	Brp puncta #		HRP area (um2)		Brp puncta density (um-2)		Brp puncta intensity (a.u.)
	elavc155-Gal4/+	elavc155-Gal4 > UAS-venus-Dysbindin	elavc155-Gal4/+	elavc155-Gal4 > UAS-venus-Dysbindin	elavc155-Gal4/+	elavc155-Gal4 > UAS-venus-Dysbindin	elavc155-Gal4/+	elavc155-Gal4 > UAS-venus-Dysbindin
	669	685	547.01	521.98	1.22	1.31	114.32	105.25
	830	623	702.53	502.31	1.18	1.24	90.73	124.08
	621	508	447.1	362.35	1.39	1.4	119.42	133.64
	445	470	336.09	265.16	1.32	1.77	107.19	119.7
	513	487	359.51	385.94	1.43	1.26	126.18	131.69
	485	400	279.9	249.82	1.73	1.6	113.43	115.82
	578	621	466.44	465.22	1.24	1.33	142.85	186.46
	620	460	410.52	350.69	1.51	1.31	183.71	158.22
	342	505	282.63	438.27	1.21	1.15	198.54	159.27
		374		276.09		1.35		197.6
		471		479.11		0.98		191.92
mean	567	509.455	425.748	390.631	1.35889	1.33636	132.93	147.605
SD	141.672	96.17	135.94	98.2312	0.178777	0.209775	36.0204	32.8731
SEM	50.0887	30.4116	48.0619	31.0634	0.0632071	0.0663366	12.7351	10.3954
