# Supplementary material for: The E3 ligase Thin controls homeostatic plasticity through neurotransmitter release repression
Source: eLife. 2022 Jul 7;11:e71437. doi: 10.7554/eLife.71437 (PMC9299833; doi:10.7554/eLife.71437)
Supplement: Figure 5—figure supplement 2—source data 1. — Thin localizes in close proximity to Dysbindin and Thin degrades Dysbindin in Drosophila S2 cells. [file elife-71437-fig5-figsupp2-data1.xlsx]

## Sheet: F5 S2
					No thin				1 x thin				2 x thin
5B	Pearson correlation coefficient	Pearson correlation coefficient (randomized)		5D	Dysb (a.u.)	Tubulin (a.u.)	Dysb/Tubulin		Dysb (a.u.)	Tubulin (a.u.)	Dysb/Tubulin		Dysb (a.u.)	Tubulin (a.u.)	Dysb/Tubulin
	0.862725	0.00266319			89.067	135.524	0.657205		38.199	135.742	0.281409		10.528	86.074	0.122313
	0.822107	-3.9e-05			70.868	97.945	0.723549		19.051	128.895	0.147802		4.298	110.37	0.0389417
	0.669853	0.00268339			33.936	111.55	0.304222		12.904	79.316	0.162691		5.082	71.201	0.0713754
	0.9576	0.00075418			14.897	98.3	0.151546		36.688	103.899	0.353112		6.896	68.784	0.100256
	0.965594	0.000695815
	0.959529	0.00269591		mean	52.192	110.83	0.459131		26.7105	111.963	0.236254		6.701	84.1072	0.0832216
	0.821658	0.000518071		SD	33.8268	17.6384	0.275533		12.66	25.7098	0.0982004		2.77366	19.1047	0.0361449
	0.726348	0.00152372		SEM	19.5299	10.1835	0.159079		7.30923	14.8436	0.056696		1.60137	11.0301	0.0208683
	0.896445	0.00242688
	0.708488	0.000546055
	0.817909	0.00103335
	0.890253	-0.000458202
	0.946145	0.0021261
	0.922742	0.000441644
	0.56072	-0.00042413
	0.829751	0.00103716
	0.746943	0.0022104
	0.895658	0.00220039
	0.566757	0.00318014
	0.94864	0.000562163
	0.910768	0.00153955
	0.877951	0.00155895
mean	0.832027	0.00133981
SD	0.121481	0.00107145
SEM	0.0265094	0.000233809
