# Supplementary material for: The E3 ligase Thin controls homeostatic plasticity through neurotransmitter release repression
Source: eLife. 2022 Jul 7;11:e71437. doi: 10.7554/eLife.71437 (PMC9299833; doi:10.7554/eLife.71437)
Supplement: Figure 5—source data 1. [file elife-71437-fig5-data1.xlsx]

## Sheet: F5
	Mean Thin-Dysb nearest neighbor distance (um)	Simulated mean Thin-Dysb nearest neighbor distance (um)
NMJ 1 bouton 1	0.0988568	0.119855
NMJ 1 bouton 2	0.0933565	0.117143
NMJ 1 bouton 3	0.108712	0.13576
NMJ 1 bouton 4	0.1275	0.153765
NMJ 1 bouton 5	0.106988	0.140971
NMJ 1 bouton 6	0.107487	0.133932
NMJ 1 bouton 7	0.102011	0.129973
NMJ 1 bouton 8	0.105682	0.122676
NMJ 1 bouton 9	0.102317	0.128357
NMJ 1 bouton 10	0.110766	0.144471
NMJ 1 bouton 11	0.0887291	0.12483
NMJ 1 bouton 12	0.084936	0.107931
NMJ 1 bouton 13	0.107233	0.129736
NMJ 1 bouton 14	0.0826025	0.120419
NMJ 1 bouton 15	0.099587	0.124474
NMJ 1 bouton 16	0.0980869	0.140507
NMJ 1 bouton 17	0.129828	0.145536
NMJ 1 bouton 18	0.0959169	0.116206
NMJ 1 bouton 19	0.0987226	0.121993
NMJ 1 bouton 20	0.125589	0.135232
NMJ 1 bouton 21	0.0866745	0.120585
NMJ 1 bouton 22	0.0990049	0.122455
NMJ 1 bouton 23	0.0914928	0.118204
NMJ 1 bouton 24	0.109608	0.138242
NMJ 2 bouton 1	0.100847	0.102912
NMJ 2 bouton 2	0.0818566	0.0892284
NMJ 2 bouton 3	0.102456	0.110032
NMJ 2 bouton 4	0.104448	0.117532
NMJ 2 bouton 5	0.143317	0.117622
NMJ 2 bouton 6	0.108044	0.110439
NMJ 2 bouton 7	0.139177	0.103806
NMJ 2 bouton 8	0.159475	0.105112
NMJ 3 bouton 1	0.0852662	0.100233
NMJ 3 bouton 2	0.095611	0.129037
NMJ 3 bouton 3	0.0780614	0.120551
NMJ 3 bouton 4	0.0922082	0.112632
NMJ 3 bouton 5	0.121271	0.131642
NMJ 3 bouton 6	0.146622	0.157282
NMJ 3 bouton 7	0.105742	0.128033
NMJ 3 bouton 8	0.139118	0.207098
NMJ 3 bouton 9	0.129687	0.163662
NMJ 3 bouton 10	0.0816796	0.111746
NMJ 3 bouton 11	0.0918931	0.106583
NMJ 3 bouton 12	0.0871528	0.139203
NMJ 3 bouton 13	0.083468	0.123301
NMJ 3 bouton 14	0.0833112	0.11713
NMJ 3 bouton 15	0.0979124	0.13875
NMJ 3 bouton 16	0.0952585	0.123682
NMJ 3 bouton 17	0.101357	0.123832
NMJ 3 bouton 18	0.0889271	0.105328
NMJ 3 bouton 19	0.0840776	0.117446
NMJ 3 bouton 20	0.0833819	0.144335
NMJ 4 bouton 1	0.120174	0.123498
NMJ 4 bouton 2	0.113269	0.116296
NMJ 4 bouton 3	0.120237	0.125091
NMJ 4 bouton 4	0.0795475	0.115702
NMJ 4 bouton 5	0.103371	0.101631
NMJ 4 bouton 6	0.0831017	0.0748138
NMJ 4 bouton 7	0.0760067	0.0858724
NMJ 4 bouton 8	0.123502	0.107104
NMJ 5 bouton 1	0.191789	0.145374
NMJ 5 bouton 2	0.122997	0.109142
NMJ 5 bouton 3	0.243424	0.217455
NMJ 5 bouton 4	0.272288	0.311529
NMJ 6 bouton 1	0.117266	0.119747
NMJ 6 bouton 2	0.153808	0.133943
NMJ 6 bouton 3	0.131318	0.120746
NMJ 6 bouton 4	0.135851	0.111442
NMJ 6 bouton 5	0.267013	0.21043
NMJ 6 bouton 6	0.152593	0.143936
NMJ 6 bouton 7	0.158699	0.109868
NMJ 6 bouton 8	0.209397	0.167651
NMJ 6 bouton 9	0.220176	0.208015
NMJ 6 bouton 10	0.104636	0.109978
NMJ 6 bouton 11	0.126599	0.133732
NMJ 6 bouton 12	0.127291	0.129541
NMJ 6 bouton 13	0.161038	0.136574
NMJ 6 bouton 14	0.234527	0.177553
NMJ 6 bouton 15	0.290802	0.30174
NMJ 6 bouton 16	0.0855094	0.102558
NMJ 6 bouton 17	0.255786	0.262884
NMJ 6 bouton 18	0.113297	0.132988
NMJ 6 bouton 19	0.195859	0.159387
NMJ 6 bouton 20	0.129511	0.122056
NMJ 6 bouton 21	0.11573	0.130638
NMJ 7 bouton 1	0.0866346	0.108219
NMJ 7 bouton 2	0.0998596	0.119019
NMJ 7 bouton 3	0.0970075	0.125051
NMJ 7 bouton 4	0.104891	0.130167
NMJ 7 bouton 5	0.092085	0.129196
NMJ 7 bouton 6	0.0917674	0.110261
NMJ 7 bouton 7	0.0899981	0.116207
NMJ 7 bouton 8	0.101693	0.115961
NMJ 7 bouton 9	0.0827441	0.111708
NMJ 7 bouton 10	0.0959711	0.120319
NMJ 7 bouton 11	0.0898413	0.123238
NMJ 7 bouton 12	0.0879715	0.118201
NMJ 7 bouton 13	0.0950216	0.125243
NMJ 7 bouton 14	0.0911073	0.129868
NMJ 7 bouton 15	0.0952483	0.127934
NMJ 7 bouton 16	0.150478	0.158219
NMJ 8 bouton 1	0.0930199	0.123455
NMJ 8 bouton 2	0.095218	0.108221
NMJ 8 bouton 3	0.0861853	0.112577
NMJ 8 bouton 4	0.0987808	0.126115
NMJ 8 bouton 5	0.108123	0.123473
NMJ 8 bouton 6	0.104518	0.1314
NMJ 8 bouton 7	0.0851072	0.116097
NMJ 8 bouton 8	0.133265	0.180459
NMJ 9 bouton 1	0.0989473	0.134116
NMJ 9 bouton 2	0.0900506	0.10724
NMJ 9 bouton 3	0.0803497	0.132725
NMJ 9 bouton 4	0.104155	0.119087
NMJ 9 bouton 5	0.0911506	0.120374
NMJ 9 bouton 6	0.0952388	0.114466
NMJ 9 bouton 7	0.0947352	0.109222
NMJ 9 bouton 8	0.0882423	0.0990053
NMJ 9 bouton 9	0.0931916	0.138369
NMJ 9 bouton 10	0.0845009	0.0902517
NMJ 9 bouton 11	0.0888871	0.0936896
NMJ 9 bouton 12	0.0893271	0.112
NMJ 9 bouton 13	0.115112	0.154098
NMJ 9 bouton 14	0.130434	0.162515
NMJ 9 bouton 15	0.100695	0.126729
NMJ 9 bouton 16	0.105839	0.131045
NMJ 9 bouton 17	0.0736013	0.158262
NMJ 9 bouton 18	0.106522	0.107844
NMJ 9 bouton 19	0.106349	0.127518
NMJ 9 bouton 20	0.101993	0.108184
NMJ 10 bouton 1	0.0832822	0.103883
NMJ 10 bouton 2	0.0951973	0.118496
NMJ 10 bouton 3	0.0842231	0.110645
NMJ 10 bouton 4	0.0862201	0.117086
NMJ 10 bouton 5	0.0879136	0.111101
NMJ 10 bouton 6	0.0992534	0.126808
NMJ 10 bouton 7	0.07745	0.128371
Note that each data point corresponds to the average NND of one bouton
