# Supplementary material for: The E3 ligase Thin controls homeostatic plasticity through neurotransmitter release repression
Source: eLife. 2022 Jul 7;11:e71437. doi: 10.7554/eLife.71437 (PMC9299833; doi:10.7554/eLife.71437)
Supplement: Figure 6—source data 1. [file elife-71437-fig6-data1.xlsx]

## Sheet: F6
	mEPSC				EPSC
	WT	elavC155-Gal4 > UAS-thinRNAi	dysb1	dysb1 + elavC155-Gal4 > UAS-thinRNAi	WT	elavC155-Gal4 > UAS-thinRNAi	dysb1	dysb1 + elavC155-Gal4 > UAS-thinRNAi
	1.174	1.247	1.563	1.021	186.535	209.942	202.501	118.441
	1.025	1.073	1.212	0.913	168.123	202.381	127.051	112.385
	0.958	1.04	1.214	1.226	213.72	248.9	115.623	129.367
	1.175	1.176	1.046	1.237	212.924	236.583	126.869	154.569
	0.975	1.576	1.256	1.355	189.522	257.15	114.446	136.649
	0.84	1.181	1.12	1.257	211.987	254.048	178.968	165.616
	1.042	1.146	1.167	1.605	180.34	223.969	129.29	115.811
	1.132	1.039	1.296	1.06	90.45	203.975	113.048	75.3882
	1.106	0.984	1.35	1.186	163.91	248.905	112.45	132.506
	0.949	1.024	1.049	1.245	230.21	234.096	149.151	150.33
	1.055	0.978	1.679	1.54	187.45	264.909	154.208	171.194
	1.126	0.926	1.648	1.351	180.5	218.111	126.929	140.773
	1.023	0.943			216.95	252.12	114.094	127.013
	1.097	0.951			130.13	200.84	146.175
	1.075	0.994			190.54	200.41	153.193
	1.004	1.036			165.65	220.4	122.417
	1.039	1.075			120.93	190.012	156.341
					178.95	170.29
					122.12	220.3
					153.43	189.28
					177.984	190.82
					145.205	202.11
						220.21
						160.08
						240.04
						198.23
						270.22
						214.97
mean	1.04676	1.08171	1.3	1.24967	173.525	219.404	137.809	133.08
SD	0.087093	0.156564	0.219734	0.19963	35.4441	28.3236	25.5523	25.2695
SEM	0.0217733	0.039141	0.0662522	0.0601908	7.73453	5.45088	6.38807	7.29469
