# Supplementary material for: The E3 ligase Thin controls homeostatic plasticity through neurotransmitter release repression
Source: eLife journal article supplement (doi:10.7554/elife.71437), 2022-07-07
Supplement: supp [file elife_poa_e71437_Figure_1_figure_supplement_2.pdf › elife_poa_e71437_Figure_1_figure_supplement_2.pdf]

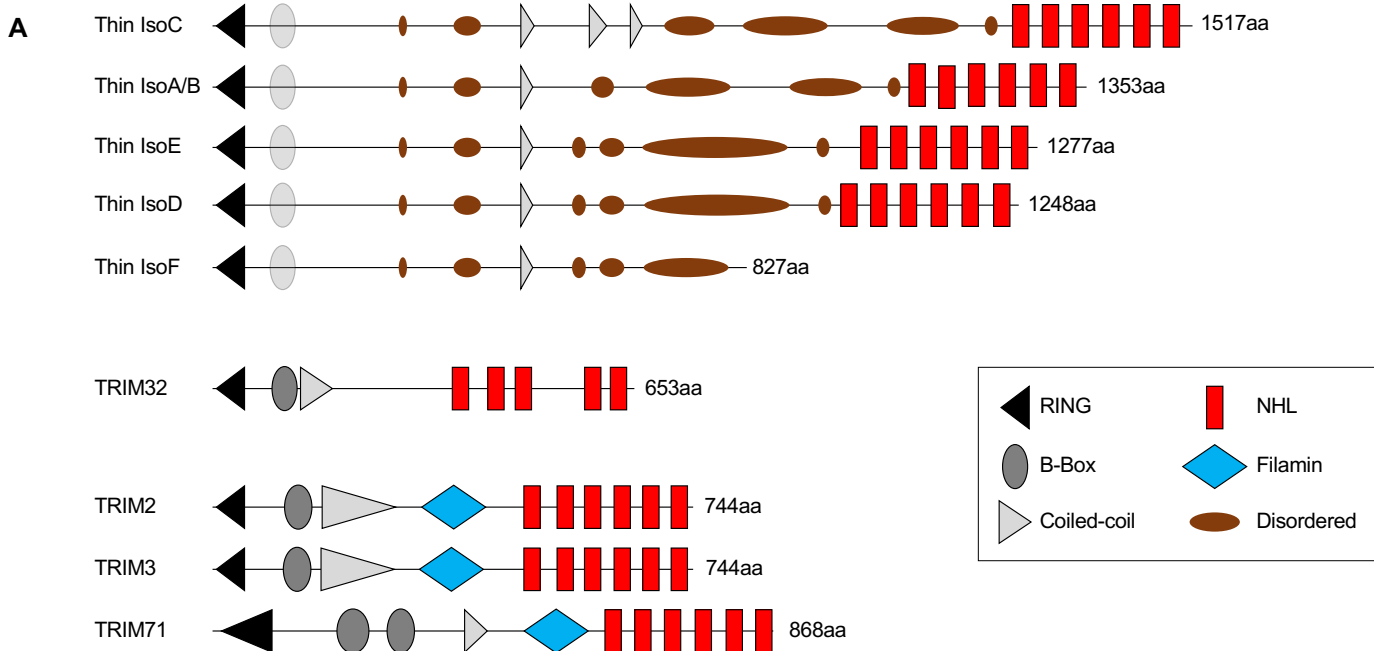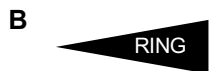

Thin: CCVCLDRYR----IPKLLPCQHSFCMEPCMEGLVDYVRRQVKCEPCR  
 TRIM32: CPICMESFTTEQLRPKLLHCGHGTICR-QCLEKLLASSINGVRCPFCS  
 TRIM2: CSICLERYK----NPKVLPCLHTFCE-RCLQNYIPAHSLLTSCPVCR  
 TRIM3: CSICLDRYQ----CPKVLPCCLHTFCE-RCLQNYIPAQSLTLSCPVCR  
 \* : \* : : \* : \* : \* \* : : : : \* : \*

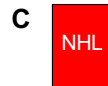

Thin: LSTVGGEGSDDGQKFPRGVAVDQGYIFVADSGNNRIQIFNPD  
 TRIM32: GRQISHFFSENEDEFRCIAGMCDVARGDLIVADSSRKEILHFPKG  
 TRIM2: MLKFGSNGEGNGQFNAPTGVAVDSNGNIIVADWGNRSRIQVFDGS  
 TRIM3: LFKFGSHGEGNGQFNAPTGVAVDSNGNIIVADWGNRSRIQVFDSS  
 TRIM71: ARFLGSEGTGNGQFLRPQGVAVDQEGRIIVADSRNHRVQMFESN  
 . . : : \* : \* \* . \* : : \* \* . . : \*
