# Supplementary material for: The E3 ligase Thin controls homeostatic plasticity through neurotransmitter release repression
Source: eLife. 2022 Jul 7;11:e71437. doi: 10.7554/eLife.71437 (PMC9299833; doi:10.7554/eLife.71437)
Supplement: Supplementary file 1. — Data are mean ± SEM. UAS-RNAis were driven in neurons by elavc155-Gal4, and elavc155-Gal4/Y served as the control. We tested 157 putative E3 ligase-encoding genes and 11 E3-associated genes, using 180 lines (UAS-RNAi or mutants; some genes were targeted with multiple lines; mean n = 4 NMJs per line, range 3–12 per line). Control data were continuously collected throughout the genetic screen. See Materials and methods for further details. [file elife-71437-supp1.xlsx]

## Sheet: Sheet1
Gene name	CG #		EPSC (nA)	mEPSP (mV)	Source	Line code	Type
WT		C155 > mcherryRNAi or W1118	-173.15 ± 4.8	0.65 ± 0.016
CG4813	CG4813	ring finger protein 220	-46.42 ± 14.9	0.88 ± 0.191	Bloomington	61303	RNAi
slmb	CG3412	supernumerary limbs	-56.08 ± 9.5	0.67 ± 0.059	Bloomington	33986	RNAi
Topors	CG15104	Topoisomerase I-interacting protein	-80.82 ± 11.4	0.56 ± 0.045	Bloomington	34671	RNAi
FBXO11	CG9461	F-box protein 11	-91.33 ± 9.37	0.42 ± 0.012	Bloomington	31484	mutant
CG6923	CG6923	CG6923	-95.55 ± 7.7	0.59 ± 0.166	Bloomington	32448	RNAi
Ube3a	CG6190	Ubiquitin protein ligase E3A	-96.66 ± 11.6	0.44 ± 0.031	Bloomington	31972	RNAi
tn	CG15105	thindeltaA mutant	-99.21 ± 10.5	0.48 ± 0.012	Labeau Dimena 2012	-	mutant
Cul1 line 2	CG1877	Cullin 1	-100.95 ± 17.7	0.48 ± 0.034	Bloomington	29520	RNAi
Socs36E	CG15154	Suppressor of cytokine signaling at 36E	-101.3 ± 11.9	0.63 ± 0.11	Bloomington	35036	RNAi
Msl-2	CG3241	male-specific lethal 2	-102.45 ± 7.8	0.55 ± 0.037	Bloomington	35390	RNAi
Mrgn1	CG9941	Mahogunin ring finger 1	-102.55 ± 12.6	0.68 ± 0.021	Bloomington	43234	RNAi
ctrip	CG42574	CG42574	-102.87 ± 12	0.46 ± 0.072	Bloomington	33435	RNAi
ktl	CG10830	Kctd12-like	-103.35 ± 14.9	0.72 ± 0.097	Bloomington	57171	RNAi
vhl	CG13221	von Hippel-Lindau	-104.45 ± 11.2	0.52 ± 0.087	Bloomington	50727	RNAi
mei-P26	CG12218	meiotic P26	-106.44 ± 8.8	0.51 ± 0.113	Bloomington	36855	RNAi
lds	CG2684	lodestar	-106.47 ± 4.8	0.81 ± 0.071	Bloomington	34980	RNAi
FBXO11	CG9461	F-box protein 11	-109.12 ± 1.34	0.42 ± 0.03	Bloomington	16932	RNAi
mura	CG9381	murashka	-110.27 ± 9.9	0.84 ± 0.082	Bloomington	35236	RNAi
POSH	CG4909	Plenty of SH3s	-111.74 ± 26.9	0.58 ± 0.051	Bloomington	64569	RNAi
Smt3	CG4494	Small ubiquitin like modifier	-112.19 ± 9.1	0.65 ± 0.176	Bloomington	36125	RNAi
roc1a	CG16982	Regulator of cullins 1a	-112.9 ± 6.3	0.54 ± 0.032	Bloomington	31067	RNAi
fancl	CG12812	Fancl	-113.56 ± 18.6	0.74 ± 0.064	Bloomington	33050	RNAi
CG3356	CG3356	CG3356	-114.12 ± 19.6	0.34 ± 0.025	Bloomington	31376	RNAi
Ube4B	CG9934	Ubiquitination factor E4B	-116.11 ± 12.4	0.71 ± 0.054	Bloomington	27540	RNAi
Mi-2	CG8103	Mi-2	-118.11 ± 3.7	0.59 ± 0.021	Bloomington	35398	RNAi
brat	CG10719	brain tumor	-118.48 ± 9.3	0.73 ± 0.069	Bloomington	34646	RNAi
Lztr1	CG3711	Leucine zipper like transcription regulator 1	-119.86 ± 2.9	0.57 ± 0.08	Bloomington	33422	RNAi
EloA	CG6755	Elongin A	-120.77 ± 8.1	0.71 ± 0.01	Bloomington	37017	RNAi
XNP	CG4548	XNP	-124.12 ± 18.1	0.6 ± 0.088	Bloomington	32894	RNAi
Fbxl4	CG1839	F box and leucine-rich-repeat gene 4	-124.2 ± 9.8	0.53 ± 0.013	Bloomington	31363	RNAi
STUB1	CG5203	STIP1 homology and U-box containing protein 1	-124.52 ± 23.9	0.57 ± 0.012	Bloomington	33938	RNAi
Fbl6	CG13213	F-box and leucine-rich repeat protein 6	-125.1 ± 10.7	0.62 ± 0.032	Bloomington	43262	RNAi
SkpA	CG16983	SKP1-related A	-126.94 ± 31.4	0.6 ± 0.08	Bloomington	32991	RNAi
CG5382	CG5382	CG5382	-126.97 ± 17.6	0.41 ± 0.03	Bloomington	64551	RNAi
CG42797	CG42797	Hecw ubiquitin protein ligase	-127.31 ± 9.3	0.61 ± 0.071	Bloomington	51767	RNAi
CG9003	CG9003	CG9003	-127.76 ± 14	0.46 ± 0.02	Bloomington	62439	RNAi
CG9467	CG9467	CG9467	-129.8 ± 2.5	0.64 ± 0.117	Bloomington	57170	RNAi
NSD	CG4976	Nuclear receptor binding SET domain protei	-130.1 ± 19.7	0.59 ± 0.037	Bloomington	34033	RNAi
STUB1	CG5203	STIP1 homology and U-box containing protein 1	-130.49 ± 7.3	0.53 ± 0.098	Bloomington	34017	RNAi
Ebi	CG4063	Ebi	-130.77 ± 17.2	0.44 ± 0.055	Bloomington	34981	RNAi
Sce	CG5595	Sex combs extra	-130.86 ± 9.7	0.6 ± 0.037	Bloomington	35446	RNAi
Kdm2	CG11033	Lysine demethylase 2	-130.92 ± 8.7	0.68 ± 0.031	Bloomington	33699	RNAi
CG33144	CG33144	lincRNA.281	-131.49 ± 11.7	0.73 ± 0.016	Bloomington	64033	RNAi
mahj	CG10080	mahjong	-131.63 ± 5.5	0.77 ± 0.132	Bloomington	34912	RNAi
Prp19	CG5519	Pre-RNA processing factor 19	-131.84 ± 10.3	0.91 ± 0.1	Bloomington	32865	RNAi
Sce	CG5595	Sex combs extra	-131.91 ± 9	0.58 ± 0.154	Bloomington	31612	RNAi
CG5555	CG5555	CG5555	-132.24 ± 7.5	0.59 ± 0.044	Bloomington	55402	RNAi
CG10440	CG10440	tiwaz	-132.5 ± 42.5	0.67 ± 0.113	Bloomington	57397	RNAi
Nedd4	CG42279	Nedd4	-132.51 ± 4.8	0.5 ± 0.057	Bloomington	34741	RNAi
CSN4	CG8725	COP9 signalosome subunit 4	-132.68 ± 7.7	0.82 ± 0	Bloomington	42798	RNAi
mus302	CG13025	mutagen-sensitive 302	-132.89 ± 38.6	0.55 ± 0.089	Bloomington	62460	RNAi
CG6179	CG6179	CG6179	-132.94 ± 22.6	0.83 ± 0.076	Bloomington	56909	RNAi
HUWE1	CG8184	HECT, UBA and WWE domain containing E3 ubiquitin protein ligase 1	-133.34 ± 5.2	0.33 ± 0.014	Bloomington	36715	RNAi
Fsn	CG4643	F-box synaptic protein	-134.26 ± 12.2	0.63 ± 0.051	Bloomington	31096	RNAi
CG32369	CG32369	CG32369	-134.32 ± 7.2	0.57 ± 0.092	Bloomington	64028	RNAi
Fbxl4	CG1839	F box and leucine-rich-repeat gene 4	-134.42 ± 15	0.54 ± 0.039	VDRC	v15475	RNAi
TSG101	CG9712	Tumor susceptibility gene 101	-135.82 ± 16.5	0.57 ± 0.083	Bloomington	35710	RNAi
CG5961	CG5961	CG5961	-136.42 ± 20.1	0.79 ± 0.067	Bloomington	31368	RNAi
Inc	CG32810	insomniac	-136.65 ± 19.9	0.87 ± 0.037	Bloomington	50590	RNAi
Phf7	CG9576	PHD finger protein 7	-136.66 ± 13	0.64 ± 0.031	Bloomington	35807	RNAi
Smurf1	CG4943	SMAD specific E3 ubiquitin protein ligase	-136.68 ± 11	0.5 ± 0.006	Bloomington	40905	RNAi
pex10	CG7864	Peroxin 10	-137.24 ± 14.6	0.61 ± 0.045	Bloomington	51826	RNAi
dgrn	CG10981	degringolade	-137.34 ± 27.6	0.47 ± 0.091	Bloomington	27267	RNAi
rols	CG32096	rolling pebbles	-137.59 ± 6.3	0.57 ± 0.055	Bloomington	56986	RNAi
CSN6	CG6932	COP9 signalosome subunit 6	-137.74 ± 7.4	0.6 ± 0.069	Bloomington	36073	RNAi
hiw	CG32592	Highwire	-137.96 ± 13.9	0.84 ± 0.036	Bloomington	28031	RNAi
CG8786	CG8786	Ring finger protein 146	-138.83 ± 10	0.61 ± 0.17	Bloomington	40882	RNAi
CG13442	CG13442	CG13442	-138.83 ± 23.8	0.77 ± 0.03	Bloomington	35384	RNAi
Cul1 line 1	CG1877	Cullin 1	-138.96 ± 17.7	0.48 ± 0.019	Bloomington	36601	RNAi
Su(dx)	CG4244	Suppressor of deltex	-139.23 ± 13.6	0.73 ± 0.041	Bloomington	36836	RNAi
gus	CG2944	gustavus	-139.8 ± 10.4	0.77 ± 0.068	Bloomington	66321	RNAi
DEF8	CG11534	differentially expressed in FDCP 8 homolog	-139.96 ± 6.5	0.84 ± 0.082	Bloomington	34384	RNAi
Ago	CG15010	archipelago	-140.79 ± 11.3	0.63 ± 0.077	Bloomington	34802	RNAi
mr	CG3060	Morula	-140.82 ± 0.1	0.52 ± 0.091	Bloomington	50547	RNAi
gol	CG2679	gol	-141 ± 5.6	0.83 ± 0.228	Bloomington	28785	RNAi
dor	CG3093	deep orange	-141.46 ± 5.7	0.83 ± 0.161	Bloomington	44426	RNAi
roc1b	CG16988	Regulator of cullins 1b	-141.69 ± 6.7	0.81 ± 0.029	Bloomington	31067	RNAi
Fbxl4	CG1839	F box and leucine-rich-repeat gene 4	-142.6 ± 6.6	0.38 ± 0.047	VDRC	v15476	RNAi
SkpC	CG11941	SKP1-related C	-144.66 ± 29.1	0.68 ± 0.04	Bloomington	33925	RNAi
snama	CG3231	something that sticks like glue	-144.77 ± 13.5	0.78 ± 0.082	Bloomington	43248	RNAi
RhoBTB	CG5701	Rho-related BTB domain containing	-144.82 ± 6	0.77 ± 0.129	Bloomington	51461	RNAi
CG4238	CG4238	CG4238	-145.46 ± 11.2	0.7 ± 0.03	Bloomington	36086	RNAi
Mdlc	CG4973	midlife crisis	-145.75 ± 10.6	0.74 ± 0.118	Bloomington	57027	RNAi
CG10465	CG10465	CG10465	-146.5 ± 38.5	0.62 ± 0.153	Bloomington	62529	RNAi
lmgb	CG34440	lemming B	-146.68 ± 12.7	0.65 ± 0.04	Bloomington	40857	RNAi
Cand1	CG5366	Cullin-associated and neddylation-dissociated 1	-147.27 ± 9.1	0.54 ± 0.036	Bloomington	33920	RNAi
skpE	CG11942	SKP1-related E	-147.51 ± 18.7	0.61 ± 0.127	Bloomington	57578	RNAi
qin	CG43726	qin	-147.59 ± 14.9	0.73 ± 0.063	Bloomington	37475	RNAi
Ubr1	CG9086	Ubr1 ubiquitin ligase	-148.75 ± 19.2	0.46 ± 0.047	Bloomington	31374	RNAi
tth	CG12175	toothrin	-149.74 ± 19.4	0.52 ± 0.048	Bloomington	42849	RNAi
lmga	CG34441	lemming A	-150.22 ± 12.2	0.6 ± 0.035	Bloomington	40857	RNAi
CG42797	CG42797	Hecw ubiquitin protein ligase	-150.41 ± 12.8	0.81 ± 0.059	Bloomington	55214	RNAi
HUWE1	CG8184	HECT, UBA and WWE domain containing E3 ubiquitin protein ligase 1	-150.57 ± 22.4	0.5 ± 0.049	Bloomington	36714	RNAi
l(2)dtl	CG11295	lethal-(2)-denticleless	-151.14 ± 13.3	0.61 ± 0.026	Bloomington	51510	RNAi
CG11658	CG11658	CG11658	-151.26 ± 2.2	0.72 ± 0.119	Bloomington	43298	RNAi
Ube3a	CG6190	Ubiquitin protein ligase E3A	-151.47 ± 23.8	0.55 ± 0.078	Bloomington	57151	RNAi
Diap2	CG8293	Death-associated inhibitor of apoptosis 2	-153.62 ± 10.1	0.51 ± 0.035	Bloomington	34776	RNAi
Scrapper	CG9003	Scrapper	-153.66 ± 12.1	0.43 ± 0.047	Bloomington	31362	RNAi
Diap1	CG12284	Death-associated inhibitor of apoptosis 1	-153.89 ± 17.5	0.89 ± 0.071	Bloomington	33597	RNAi
Apc	CG1451	APC-like	-154.84 ± 7.7	0.47 ± 0.045	Bloomington	34869	RNAi
snky	CG11281	sneaky	-155.08 ± 14	0.84 ± 0.02	Bloomington	53986	RNAi
msl-1	CG10385	male-specific lethal 1	-155.97 ± 13.5	0.95 ± 0.284	Bloomington	35345	RNAi
Cbl	CG7037	Cbl proto-oncogene	-156.54 ± 17.2	0.67 ± 0.035	Bloomington	60415	RNAi
bon	CG5206	bonus	-156.71 ± 22.6	0.68 ± 0.02	Bloomington	27047	RNAi
Poe	CG14472	purity of essence	-157.02 ± 12.4	0.57 ± 0.051	Bloomington	32945	RNAi
CG3909	CG3909	CG3909	-158.09 ± 23.2	0.79 ± 0.172	Bloomington	57377	RNAi
CG10916	CG10916	CG10916	-160.58 ± 23.2	0.73 ± 0.127	Bloomington	37485	RNAi
Pic	CG7769	piccolo	-161.51 ± 9.3	0.52 ± 0.04	Bloomington	33888	RNAi
Sip3	CG1937	septin interacting protein 3	-162.2 ± 8.7	0.51 ± 0.078	Bloomington	50609	RNAi
park	CG10523	parkin	-162.5 ± 10	0.73 ± 0.02	Bloomington	38333	RNAi
CG42726	CG42726	CG42726	-163.23 ± 28.7	0.95 ± 0.069	Bloomington	64974	RNAi
mat1	CG7614	Menage a trois 1	-163.27 ± 22.1	0.85 ± 0.07	Bloomington	57312	RNAi
Nedd8	CG10679	Nedd8 ubiquitin like modifier	-163.49 ± 20.8	0.86 ± 0.06	Bloomington	33881	RNAi
unk	CG4620	unkempt	-164.26 ± 5.3	0.69 ± 0.021	Bloomington	57026	RNAi
Rabex-5	CG9139	Rabaptin-5-associated exchange factor for Rab5	-164.93 ± 2.7	0.76 ± 0.079	Bloomington	50573	RNAi
CG3894	CG3894	CG3894	-165.33 ± 7.3	0.69 ± 0.035	Bloomington	41636	RNAi
l(3)73Ah	CG4195	lethal (3) 73Ah	-165.68 ± 8.1	0.46 ± 0.019	Bloomington	44011	RNAi
Shal	CG9262	Shaker cognate l	-166.74 ± 10.5	1 ± 0.359	Bloomington	31879	RNAi
CSN7	CG2038	COP9 signalosome subunit 7	-166.76 ± 10.3	0.53 ± 0.032	Bloomington	33663	RNAi
lt	CG18028	light	-168.17 ± 9.4	0.68 ± 0.032	Bloomington	34883	RNAi
HUWE1	CG8184	HECT, UBA and WWE domain containing E3 ubiquitin protein ligase 1	-168.85 ± 9.9	0.68 ± 0.057	Bloomington	44462	RNAi
CG17019	CG17019	CG17019	-170.18 ± 31.8	0.61 ± 0.045	Bloomington	62320	RNAi
Bre1	CG10542	Bre1	-170.19 ± 30.4	0.7 ± 0.072	Bloomington	35443	RNAi
neur	CG11988	neuralized	-170.22 ± 26.5	0.5 ± 0.095	Bloomington	35412	RNAi
mri	CG1216	mrityu	-170.71 ± 13.6	0.82 ± 0.04	Bloomington	35165	RNAi
Trc8	CG2304	TRC8 ring finger protein	-172 ± 14.2	0.76 ± 0.029	Bloomington	56890	RNAi
phyl	CG10108	Phyllopod	-172.08 ± 21.5	0.41 ± 0.04	Bloomington	29433	RNAi
stc	CG3647	shuttle craft	-174.01 ± 21.6	0.62 ± 0.117	Bloomington	44051	RNAi
CG14647	CG14647	CG14647	-174.53 ± 10	0.92 ± 0.063	Bloomington	60064	RNAi
Traf4	CG3048	TNF-receptor-associated factor 4	-174.64 ± 15.8	0.62 ± 0.014	Bloomington	55226	RNAi
alien	CG9556	alien	-174.67 ± 3.9	0.76 ± 0.031	Bloomington	28908	RNAi
mib1	CG5841	Mind-bomb	-174.76 ± 5	0.55 ± 0.027	Bloomington	27320	RNAi
CG11414	CG11414	CG11414	-175.62 ± 23.7	0.67 ± 0.145	Bloomington	61288	RNAi
faf	CG1945	fat facets	-176.48 ± 15.9	0.76 ± 0.112	Bloomington	35728	RNAi
Shaw	CG2822	Shaker cognate w	-177.16 ± 4.2	0.52 ± 0.011	Bloomington	28346	RNAi
Cpsf160	CG10110	Cleavage and polyadenylation specificity factor 160	-179.8 ± 19	0.61 ± 0.055	Bloomington	55698	RNAi
stc	CG3647	shuttle craft	-180.43 ± 11.4	0.55 ± 0.083	Bloomington	43208	RNAi
CG17754	CG17754	CG17754	-180.61 ± 8.1	0.75 ± 0.035	Bloomington	38539	RNAi
Rbcn-3A	CG3585	Rabconnectin-3A	-181.02 ± 7.4	0.66 ± 0.059	Bloomington	34612	RNAi
CG1826	CG1826	BTB (POZ) domain containing 9	-181.6 ± 31.7	0.53 ± 0.113	Bloomington	38324	RNAi
Socs44A	CG2160	Suppressor of Cytokine Signaling at 44A	-182.03 ± 27.1	0.6 ± 0.061	Bloomington	42830	RNAi
d4	CG2682	d4	-182.23 ± 0.6	0.62 ± 0.08	Bloomington	43186	RNAi
Rnb	CG7837	R and B	-182.64 ± 8.6	0.65 ± 0.053	Bloomington	62842	RNAi
CG15011	CG15011	CG15011	-183.26 ± 19.7	0.58 ± 0.057	Bloomington	58284	RNAi
Sina	CG9949	seven in absentia	-183.58 ± 16	0.53 ± 0.031	Bloomington	40842	RNAi
Dp	CG4654	DP transcription factor	-183.78 ± 30.2	0.58 ± 0.03	Bloomington	30515	RNAi
CG15800	CG15800	CG15800	-184.25 ± 10.5	0.57 ± 0.057	Bloomington	61187	RNAi
Scrapper	CG9003	Scrapper	-184.32 ± 18.9	0.6 ± 0.022	VDRC	v23482	RNAi
Pnut	CG8705	peanut	-184.72 ± 3.7	0.68 ± 0.091	Bloomington	65157	RNAi
CG12084	CG12084	CG12084	-184.72 ± 22.8	0.43 ± 0.062	Bloomington	34553	RNAi
CSN8	CG42522	COP9 signalosome subunit 8	-185.22 ± 12	0.9 ± 0.018	Bloomington	33370	RNAi
Cnot4	CG31716	CCR4-NOT transcription complex subunit 4	-186.61 ± 31	0.65 ± 0.05	Bloomington	42513	RNAi
Rnf11	CG32850	Ring finger protein 11	-188.94 ± 4.3	0.92 ± 0.235	Bloomington	58136	RNAi
HERC2	CG11734	HECT and RLD domain containing protein 2	-189.16 ± 9.7	0.48 ± 0.029	Bloomington	51745	RNAi
CSN3	CG18332	COP9 signalosome subunit 3	-189.18 ± 30.8	0.64 ± 0.091	Bloomington	33369	RNAi
CG1909	CG1909	CG1909	-189.29 ± 17.6	0.72 ± 0.012	Bloomington	51461	RNAi
trx	CG8651	trithorax	-189.48 ± 46.3	0.36 ± 0.072	Bloomington	33703	RNAi
CSN5	CG14884	COP9 signalosome subunit 5	-189.7 ± 23.8	0.8 ± 0.113	Bloomington	62970	RNAi
ari-1	CG5659	Ariadne-1	-189.96 ± 15	0.6 ± 0.031	Bloomington	29416	RNAi
atl	CG6668	atlastin	-190.81 ± 11.1	0.91 ± 0.245	Bloomington	36736	RNAi
CG2247	CG2247	CG2247	-191.12 ± 1.8	0.56 ± 0.08	Bloomington	31486	RNAi
Mkrn1	CG32369	CG32369	-192.22 ± 5	0.62 ± 0.071	Bloomington	43178	RNAi
not	CG4166	non-stop	-192.52 ± 13.9	0.69 ± 0.022	Bloomington	28725	RNAi
Rnf11	CG32850	Ring finger protein 11	-194.5 ± 7.5	0.37 ± 0.038	Bloomington	44570	RNAi
dbo	CG6224	diablo	-195.01 ± 8.8	0.53 ± 0.015	Bloomington	38221	RNAi
Kpc1	CG6752	Kip1 ubiquitination-promoting complex subunit 1	-196.84 ± 40.7	0.44 ± 0.076	Bloomington	64019	RNAi
Hyd	CG9484	hyperplastic discs	-197.24 ± 15.3	0.69 ± 0.002	Bloomington	33669	RNAi
mib2	CG17492	mind bomb 2	-197.39 ± 20.5	0.69 ± 0.06	Bloomington	57833	RNAi
CG6966	CG6966	CG6966	-198.42 ± 14.6	0.76 ± 0.071	Bloomington	51409	RNAi
Rbpn-5	CG4030	Rabaptin-5	-198.15 ± 18.2	0.86 ± 0.075	Bloomington	52996	RNAi
Lpt	CG5591	Lost PHDs of trr	-199 ± 10.6	0.83 ± 0.072	Bloomington	25994	RNAi
Rab40	CG1900	Rab40	-202.53 ± 23.1	0.77 ± 0.04	Bloomington	61308	RNAi
CG2218	CG2218	CG2218	-205.49 ± 12.6	0.77 ± 0.042	Bloomington	61924	RNAi
Slip1	CG1783	SLo interacting protein 1	-210.04 ± 33.9	0.57 ± 0.059	Bloomington	51724	RNAi
CG5071	CG5071	CG5071	-211.15 ± 5.4	0.51 ± 0.05	Bloomington	65243	RNAi
gdz	CG10277	godzilla E3 ubiquitin protein ligase	-213.81 ± 9.5	0.59 ± 0.042	Bloomington	64034	RNAi
kel	CG7210	kelch	-216.42 ± 21.9	0.66 ± 0.059	Bloomington	55612	RNAi
Bub1	CG14030	Bub1 kinase	-217.16 ± 6.2	0.51 ± 0.06	Bloomington	58185	RNAi
CG33552	CG33552	CG6923	-220.47 ± 17.1	0.56 ± 0.075	Bloomington	61970	RNAi
CG16952	CG16952	CG16952	-227.57 ± 5.9	0.66 ± 0.066	Bloomington	60368	RNAi
pie	CG5354	pineapple eye	-230 ± 7.5	0.66 ± 0.089	Bloomington	63536	RNAi
						Bloomington = Bloomington Drosophila Stock Center
						VDRC = Vienna Drosophila Resource Center
