# Supplementary figures and images for: The E3 ligase Thin controls homeostatic plasticity through neurotransmitter release repression
Source: eLife journal article supplement (doi:10.7554/elife.71437), 2022-07-07

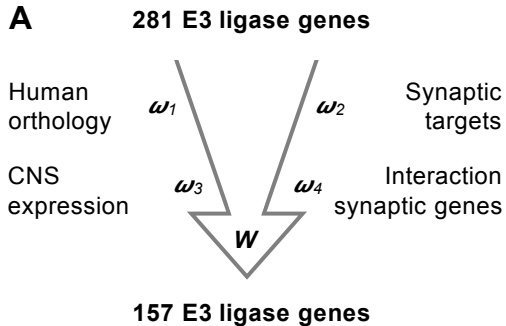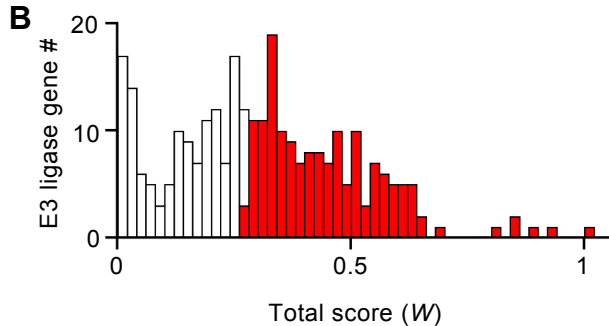

Supplement: supp [file elife_poa_e71437_Figure_1_figure_supplement_1.pdf › elife_poa_e71437_Figure_1_figure_supplement_1.pdf]

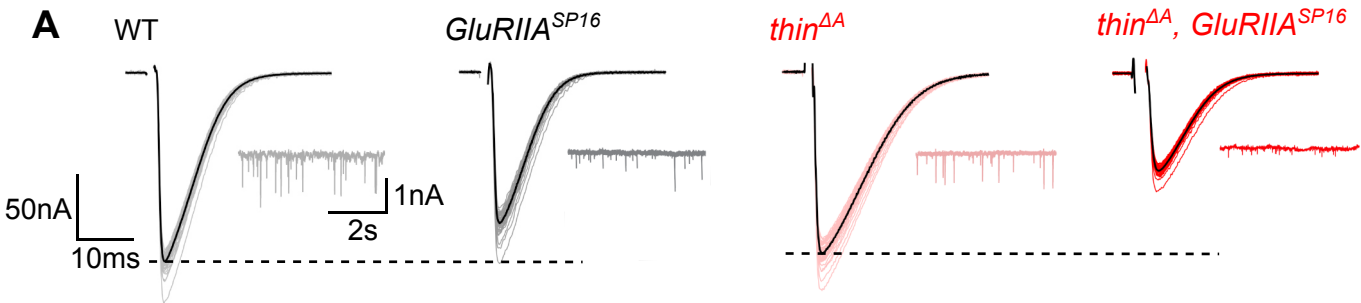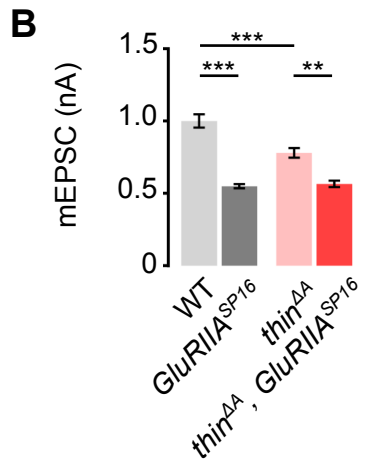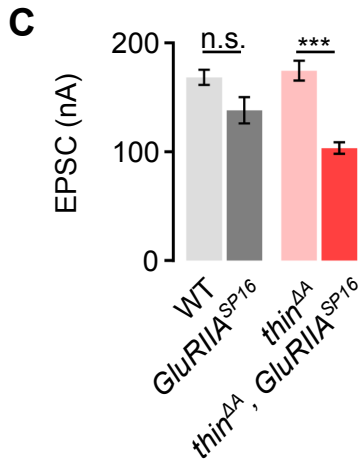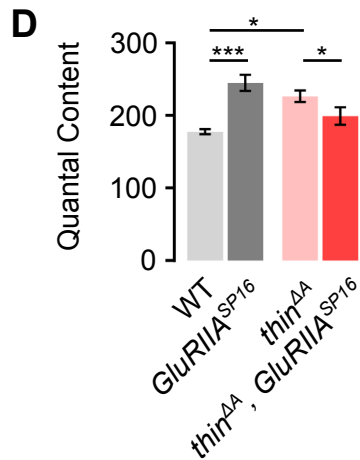

Supplement: supp [file elife_poa_e71437_Figure_2_figure_supplement_1.pdf › elife_poa_e71437_Figure_2_figure_supplement_1.pdf]

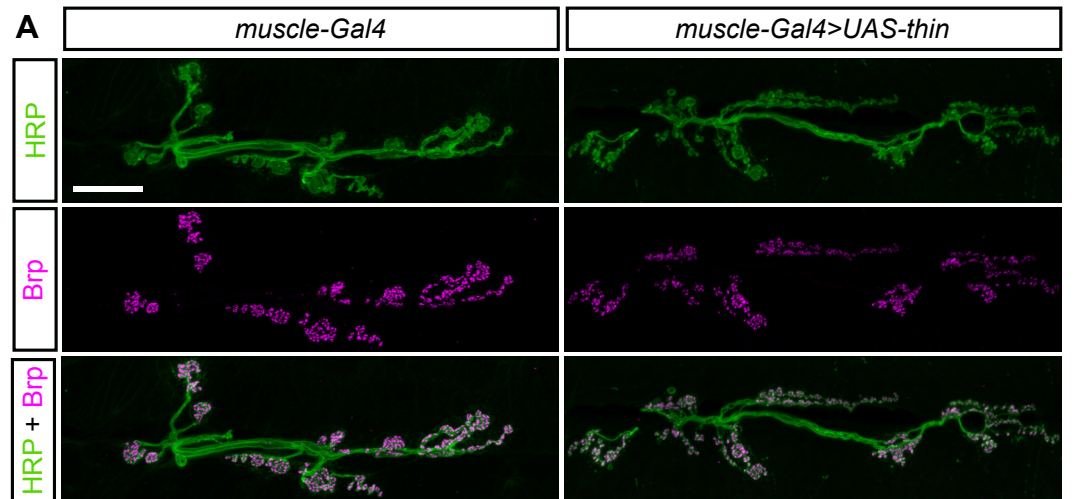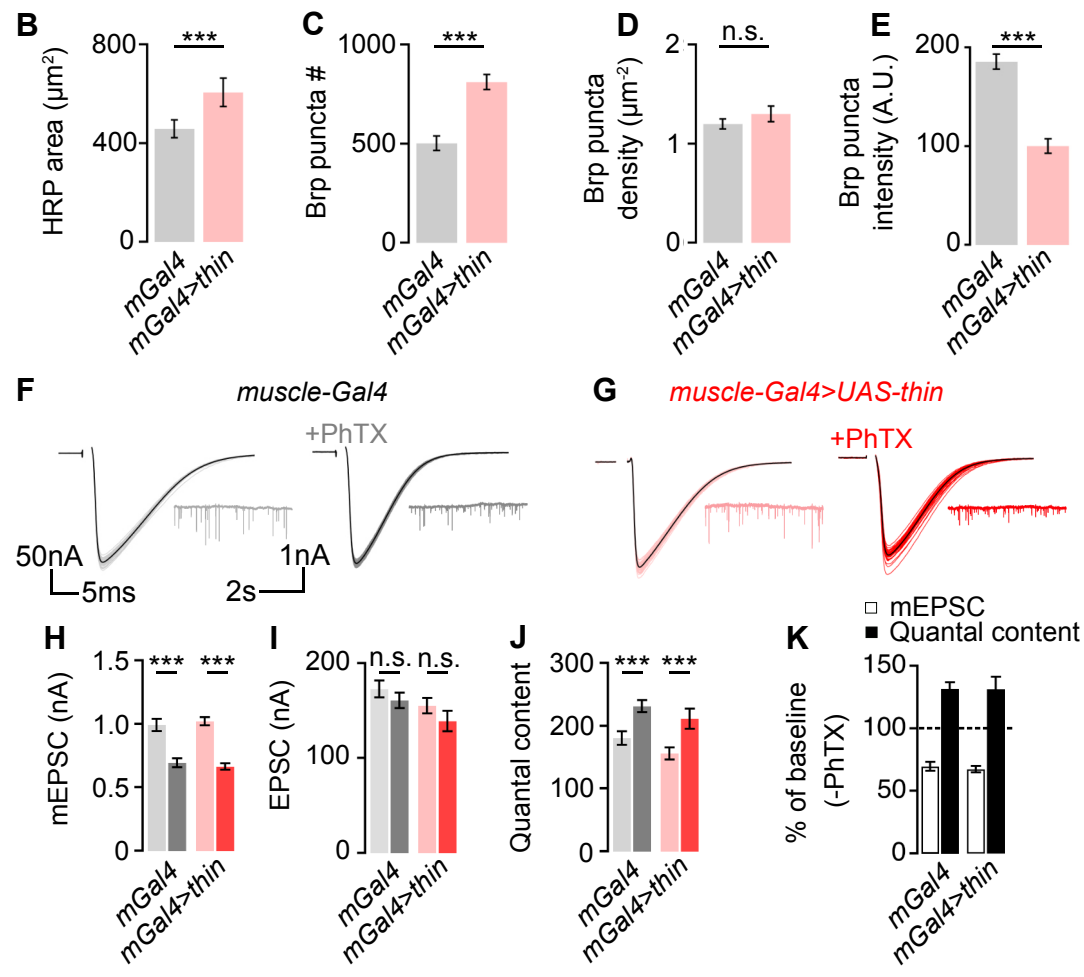

Supplement: supp [file elife_poa_e71437_Figure_3_figure_supplement_1.pdf › elife_poa_e71437_Figure_3_figure_supplement_1.pdf]

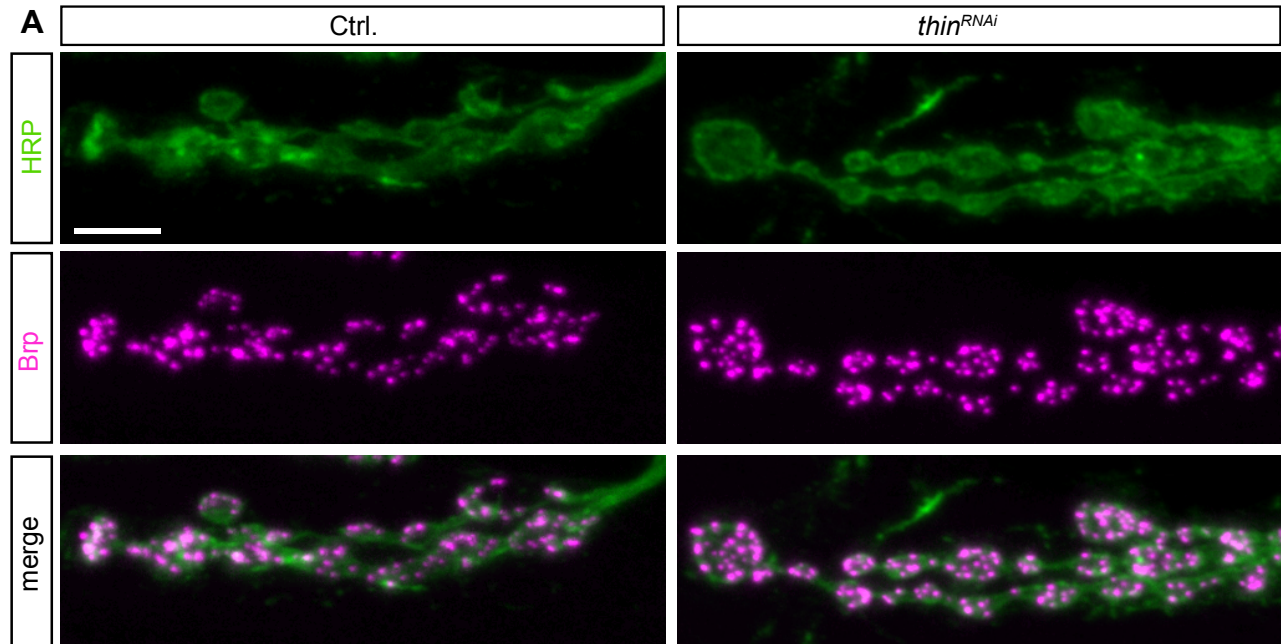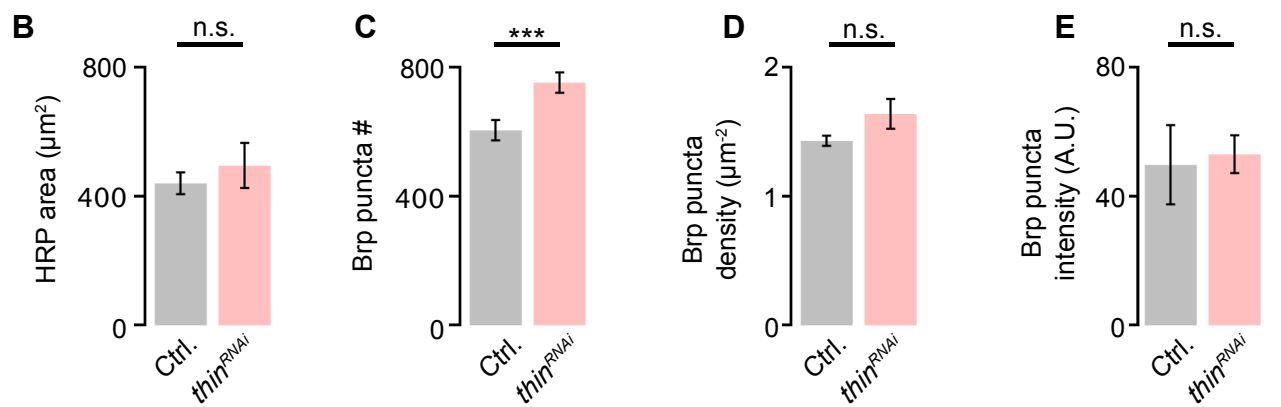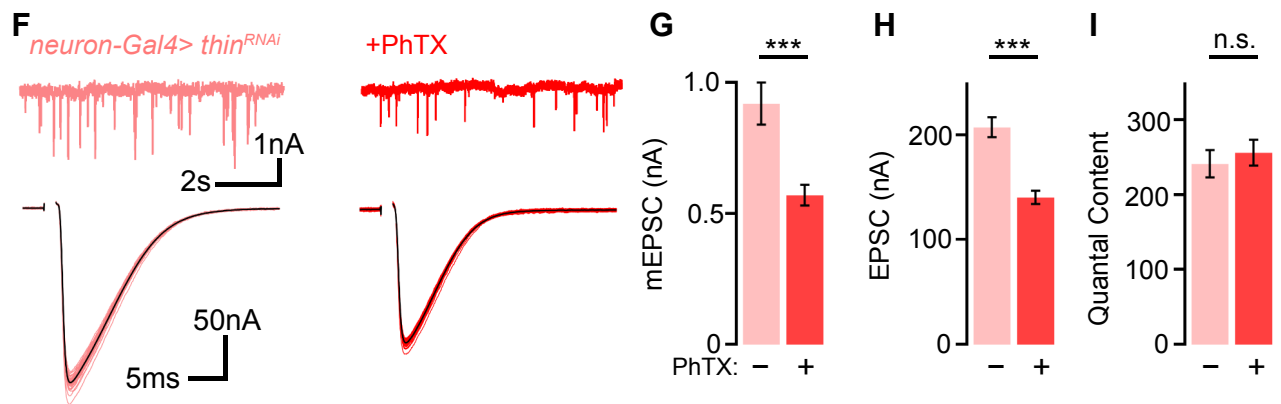

Supplement: supp [file elife_poa_e71437_Figure_4_figure_supplement_1.pdf › elife_poa_e71437_Figure_4_figure_supplement_1.pdf]

# Dysbindin - Synapsin

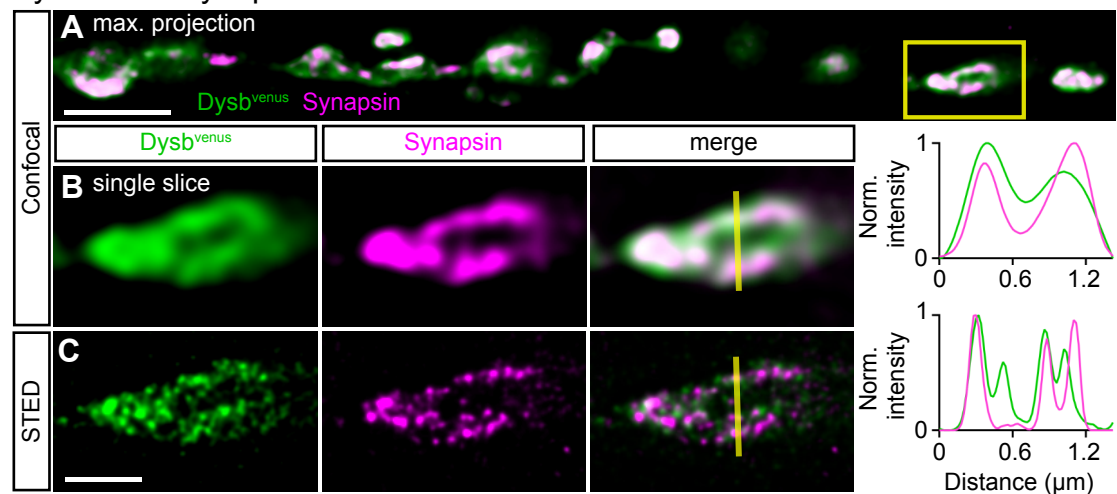

## Endogenous Thin - Brp

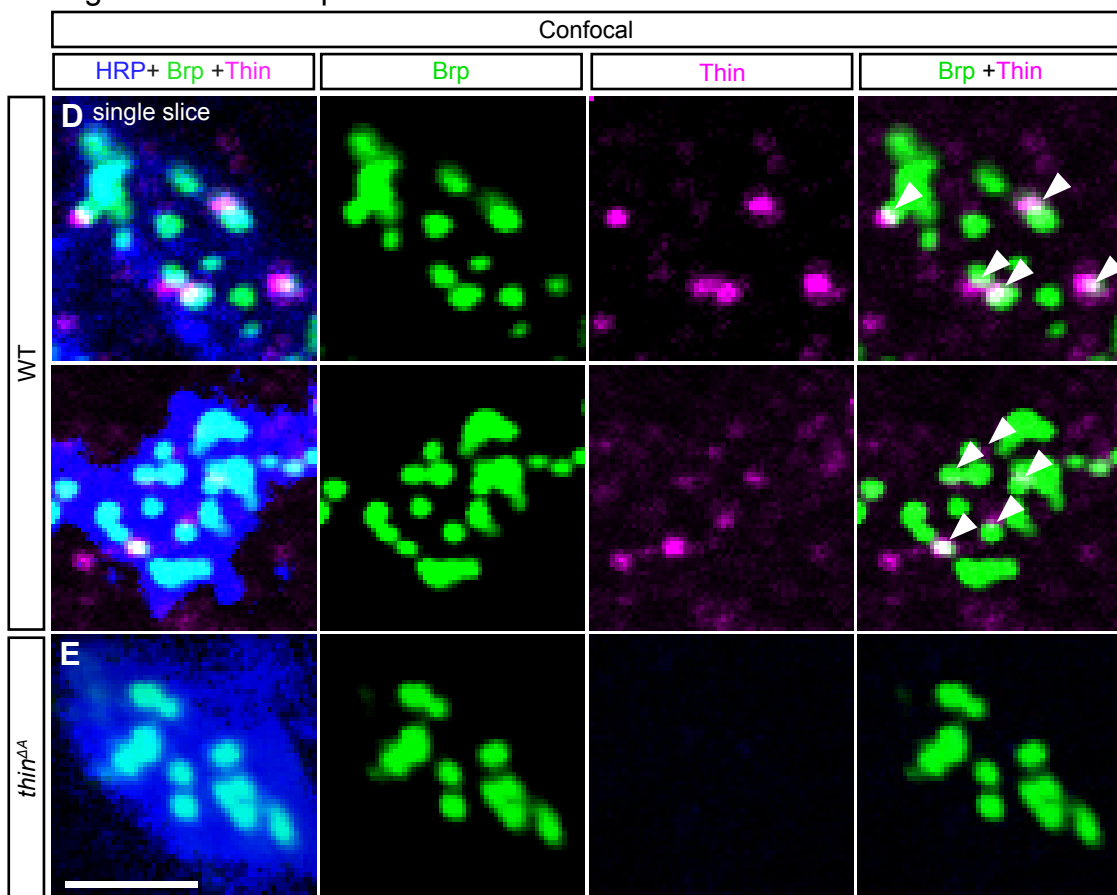

## NMJ morphology *dysbindin* OE

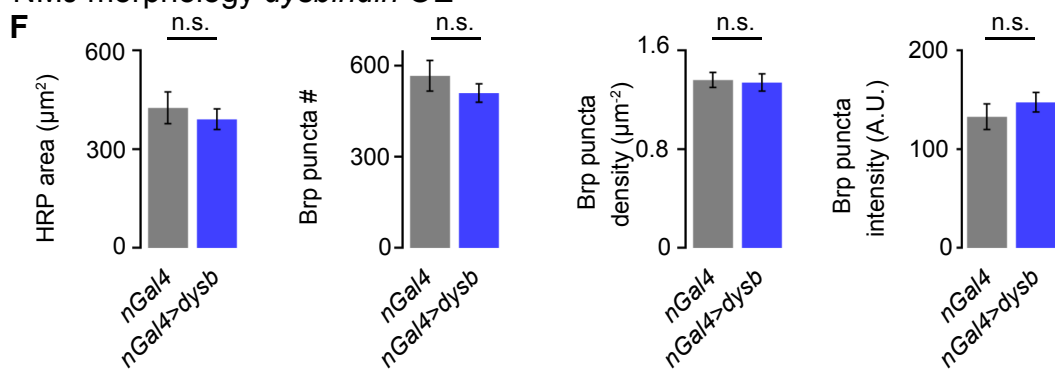

Supplement: supp [file elife_poa_e71437_Figure_5_figure_supplement_1.pdf › elife_poa_e71437_Figure_5_figure_supplement_1.pdf]

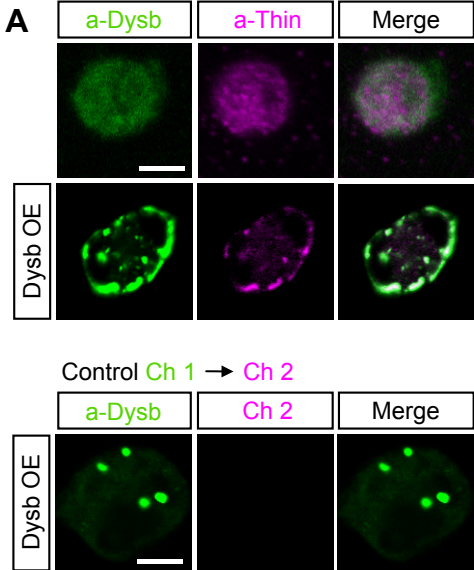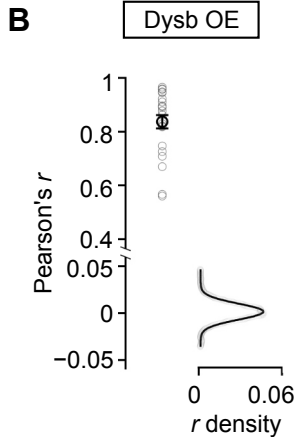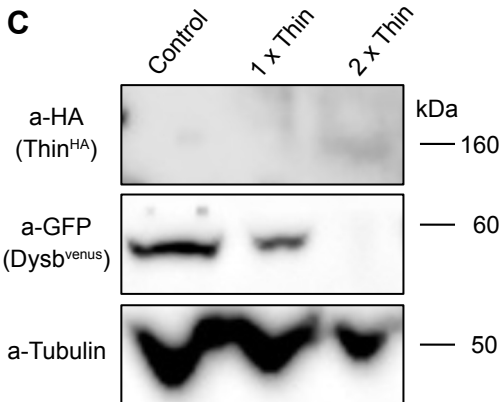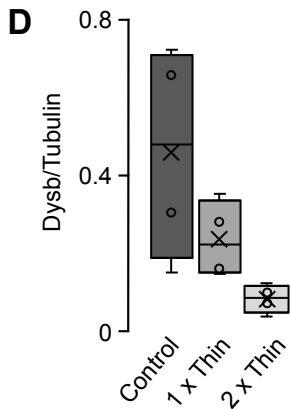

Supplement: supp [file elife_poa_e71437_Figure_5_figure_supplement_2.pdf › elife_poa_e71437_Figure_5_figure_supplement_2.pdf]
